# Supplementary material for: High-throughput computational discovery of ternary-layered MAX phases and prediction of their exfoliation for formation of 2D MXenes
Source: Royal Society of Chemistry journal article supplement (doi:10.1039/d0nr08791b), 2021-01-01
Supplement: d0nr08791b1.pdf [file d0nr08791b1.pdf]

## **High-throughput computational discovery of ternary-layered MAX phases and the prediction of their exfoliation into 2D MXenes**

Rasoul Khaledialidusti,<sup>\*a</sup> Mohammad Khazaei,<sup>\*b</sup> Somayeh Khazaei,<sup>c</sup> Kaoru Ohno<sup>d</sup>

<sup>a</sup>Department of Mechanical and Industrial Engineering, Norwegian University of Science and Technology (NTNU), 7491 Trondheim, Norway. E-mail: [rasoul.khaledialidusti@ntnu.no](mailto:rasoul.khaledialidusti@ntnu.no)

<sup>b</sup>Materials Research Center for Element Strategy, Tokyo Institute of Technology, Yokohama 226-8503, Japan.  
E-mail: [m-khazaei@mcres.titech.ac.jp](mailto:m-khazaei@mcres.titech.ac.jp)

<sup>c</sup>Theoretical Chemical Physics, University of Luxembourg, Luxembourg.

<sup>d</sup>Department of Physics, Yokohama National University, Yokohama 240-8501, Japan.

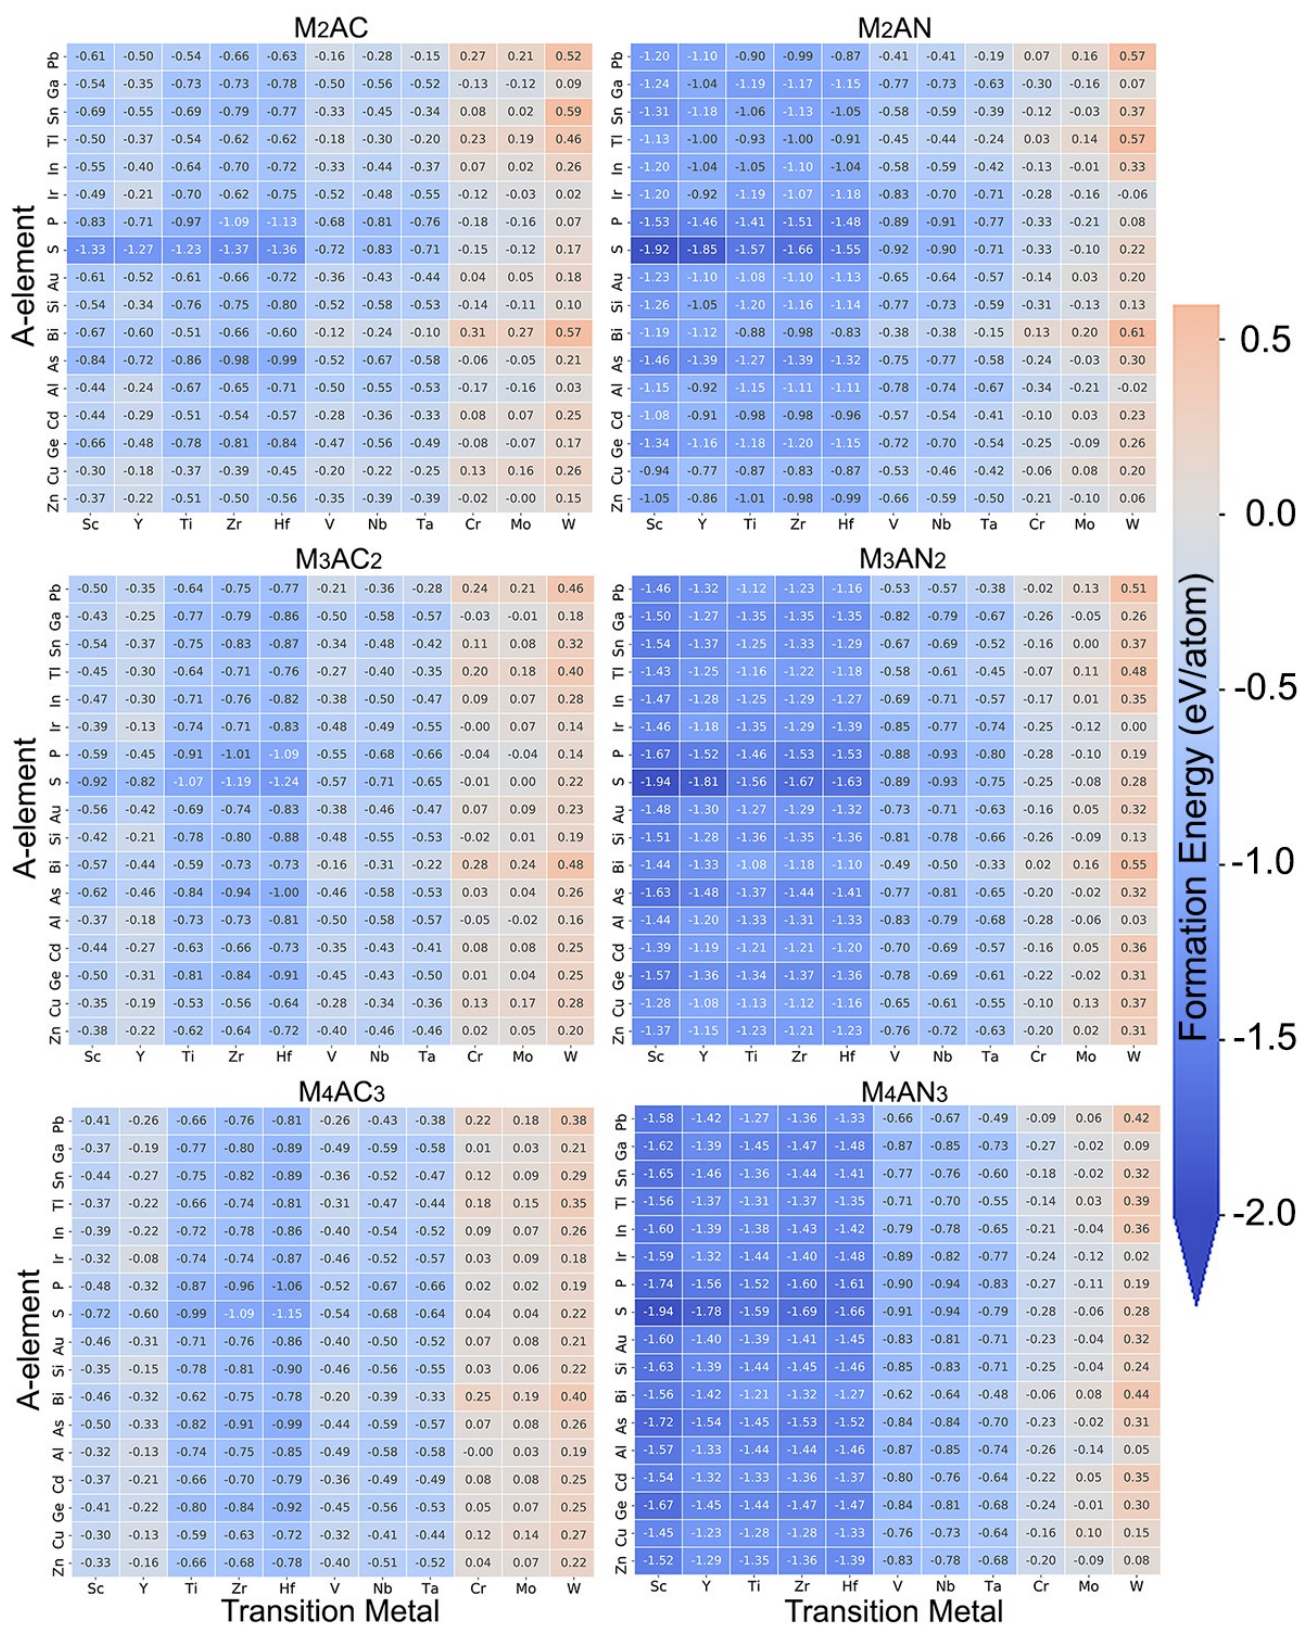

**Figure S1. Heatmaps of calculated formation energy for all MAX candidates with respect to the transition metals.**

**Table S1**

The valence electron and atomic radius (Å) values of M-, A-, and X-elements.

| M-elements | Valence Electrons | Atomic Radius | A-elements | Valence Electrons | Atomic Radius | X-elements | Valence Electrons | Atomic Radius |
|------------|-------------------|---------------|------------|-------------------|---------------|------------|-------------------|---------------|
| Sc         | 3                 | 1.59          | Ir         | 2                 | 1.32          | C          | 4                 | 0.75          |
| Y          | 3                 | 1.62          | Cu         | 1                 | 1.22          | N          | 5                 | 0.71          |
| Ti         | 4                 | 1.48          | Au         | 1                 | 1.30          |            |                   |               |
| Zr         | 4                 | 1.64          | Zn         | 2                 | 1.20          |            |                   |               |
| Hf         | 4                 | 1.64          | Cd         | 2                 | 1.40          |            |                   |               |
| V          | 5                 | 1.44          | Al         | 3                 | 1.24          |            |                   |               |
| Nb         | 5                 | 1.56          | Ga         | 3                 | 1.23          |            |                   |               |
| Ta         | 5                 | 1.58          | In         | 3                 | 1.42          |            |                   |               |
| Cr         | 6                 | 1.30          | Tl         | 3                 | 1.44          |            |                   |               |
| Mo         | 6                 | 1.46          | Si         | 4                 | 1.14          |            |                   |               |
| W          | 6                 | 1.30          | Ge         | 4                 | 1.20          |            |                   |               |
|            |                   |               | Sn         | 4                 | 1.40          |            |                   |               |
|            |                   |               | Pb         | 4                 | 1.45          |            |                   |               |
|            |                   |               | P          | 5                 | 1.09          |            |                   |               |
|            |                   |               | As         | 5                 | 1.20          |            |                   |               |
|            |                   |               | Bi         | 5                 | 1.44          |            |                   |               |
|            |                   |               | S          | 6                 | 1.04          |            |                   |               |

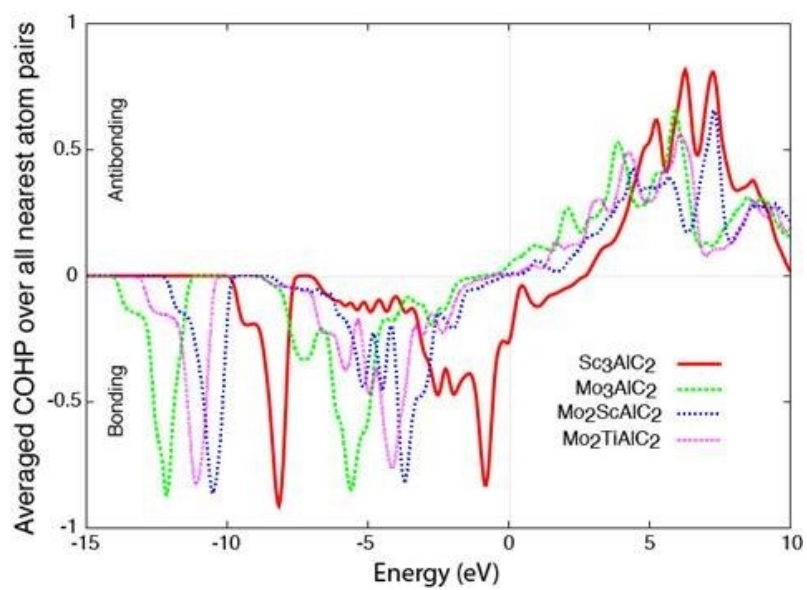

**Figure S2.** Averaged COHP over all nearest atom pairs. COHP stands for chemical orbital Hamilton population



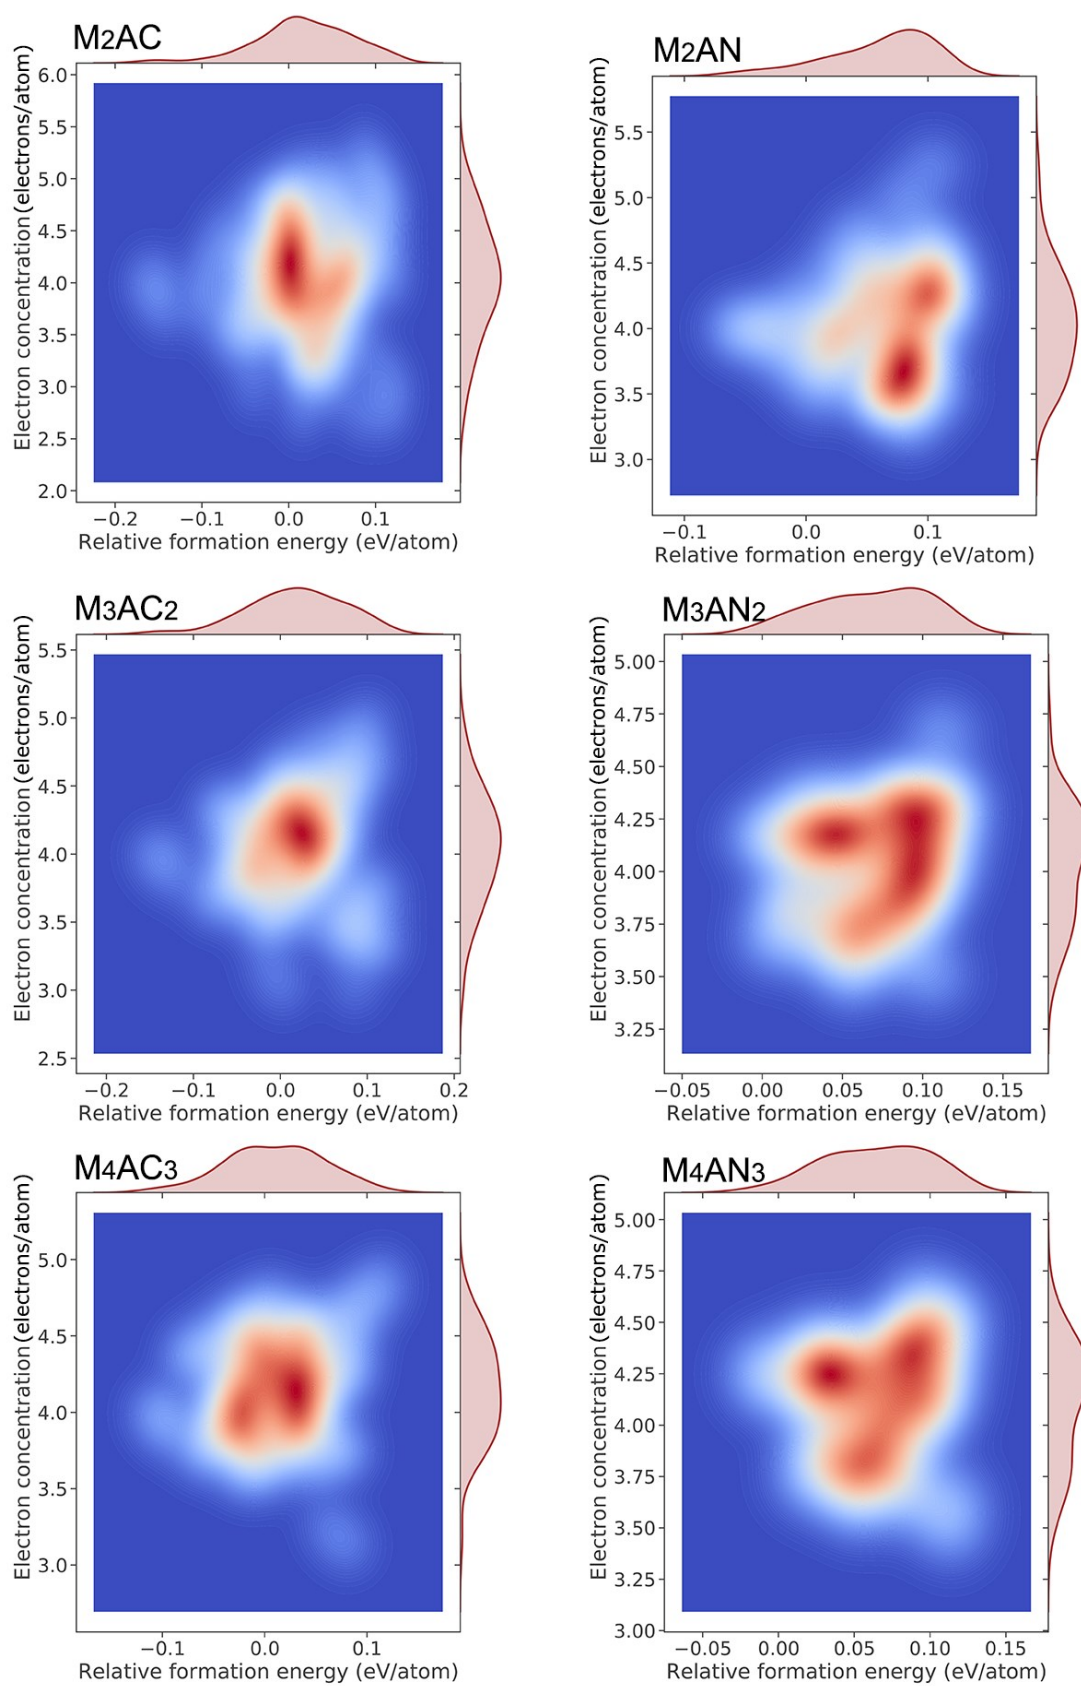

**Figure S3. Calculated electron concentration (electron/atom) of the predicted MAX phases for all MAX candidates with reference to their relative formation energy.**

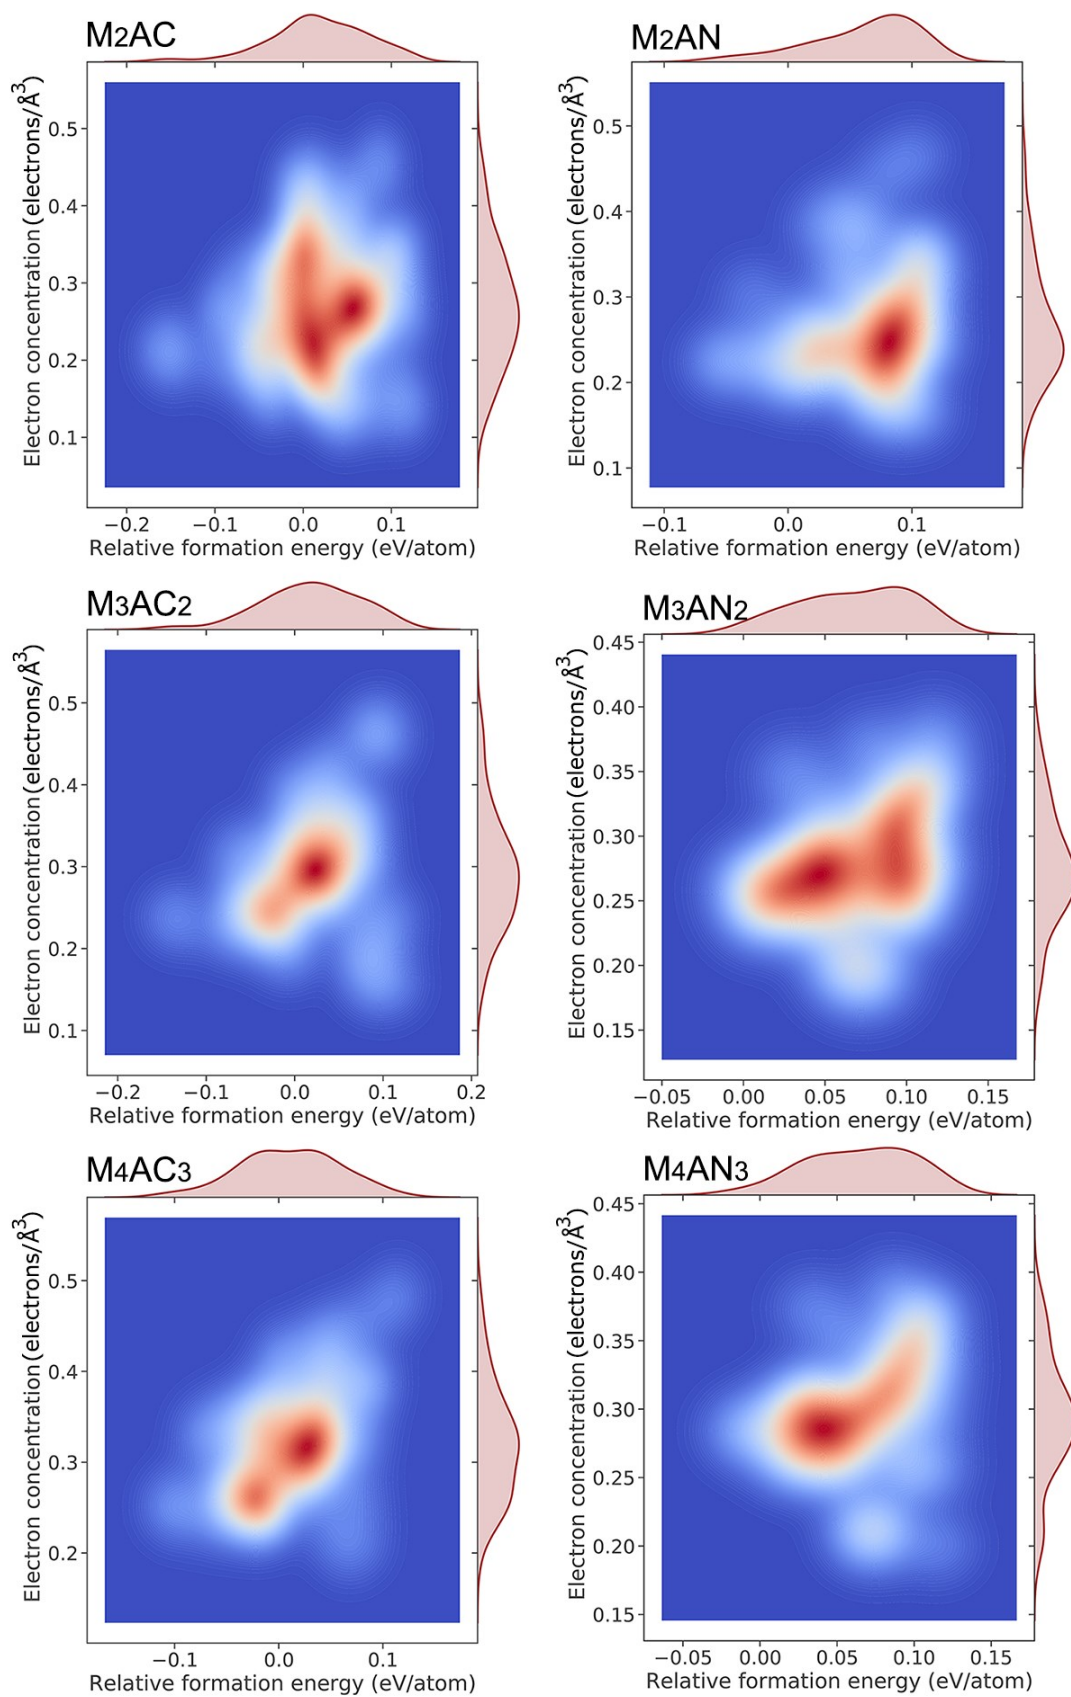

**Figure S4. Calculated electron concentration (electron/Å³) of the predicted MAX phases for all MAX candidates with reference to their relative formation energy.**

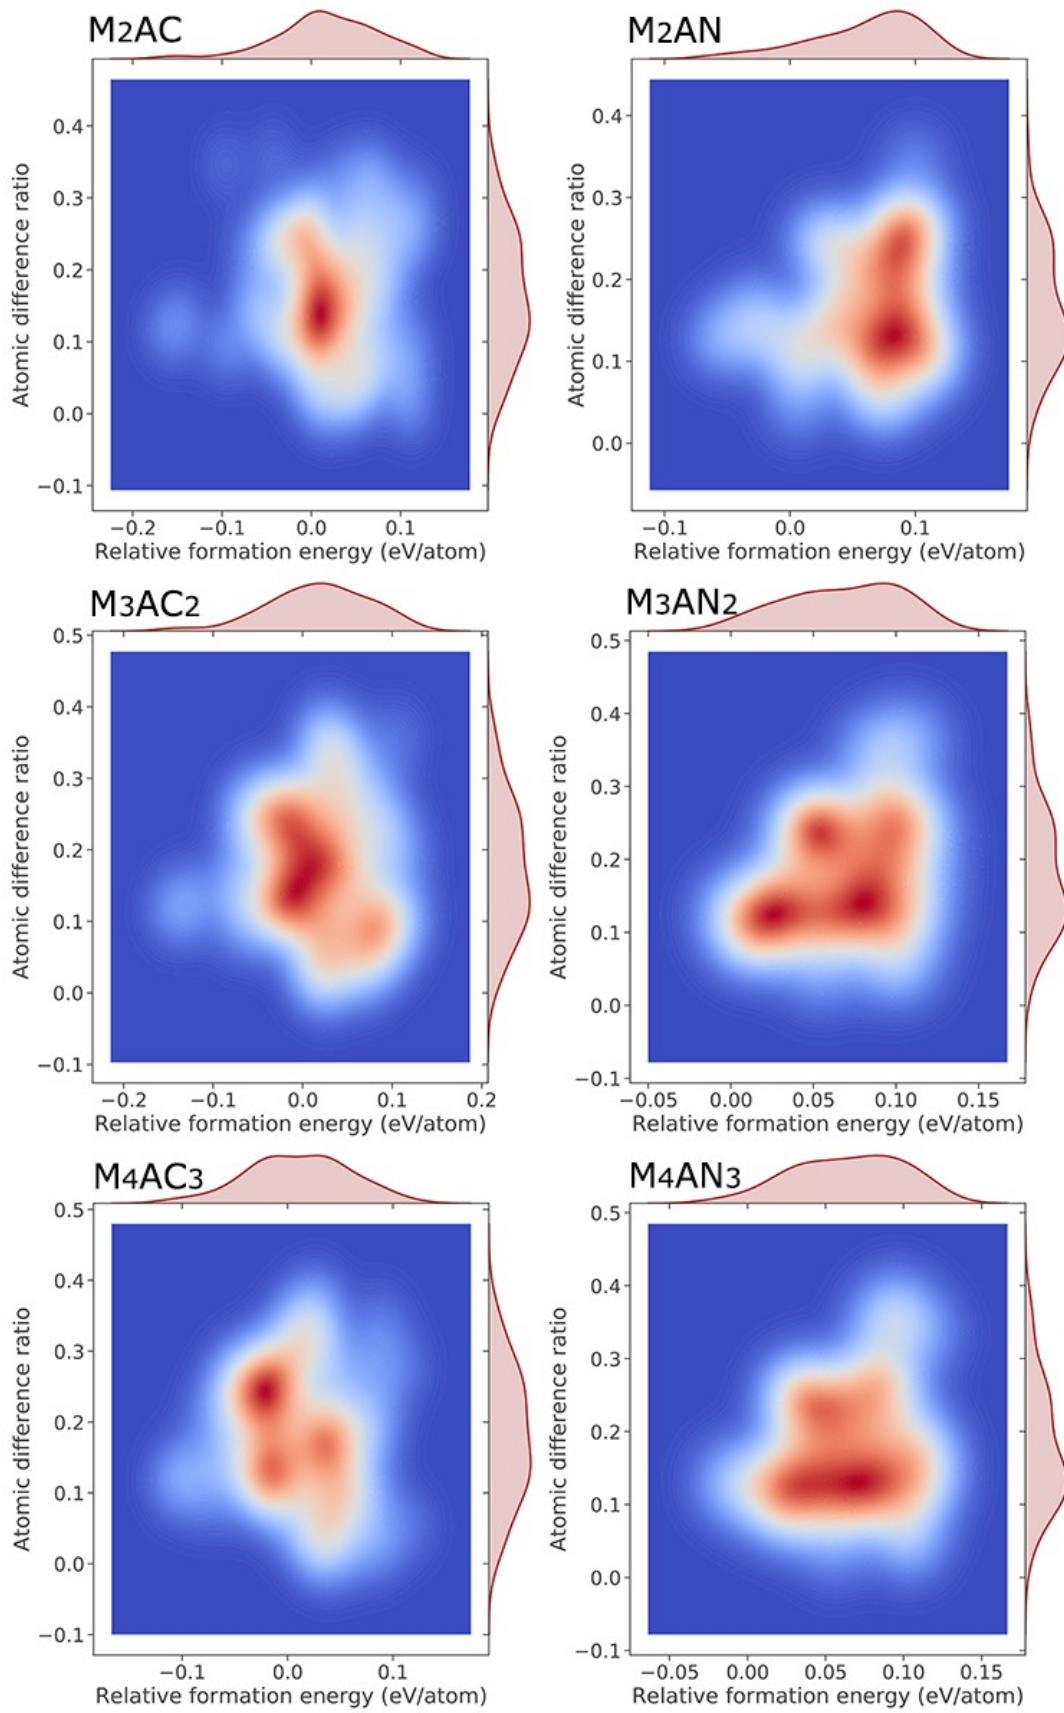

**Figure S5. Calculated size factor (electron/Å<sup>3</sup>) of the predicted MAX phases for all MAX candidates with reference to their relative formation energy.**

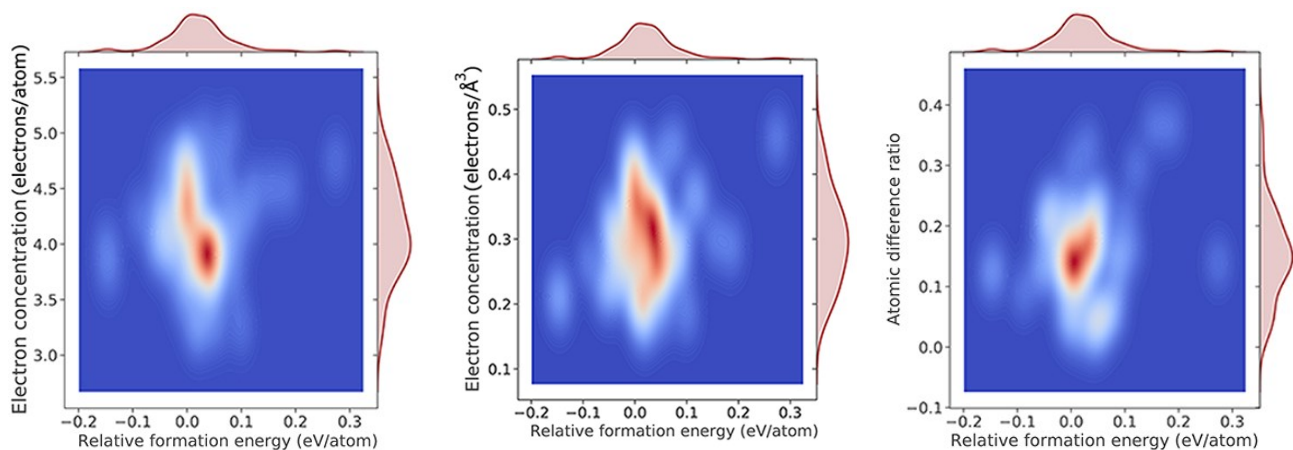

**Figure S6.** Calculated electron concentration and size factors of the synthesized MAX phases with reference to their relative formation energy.

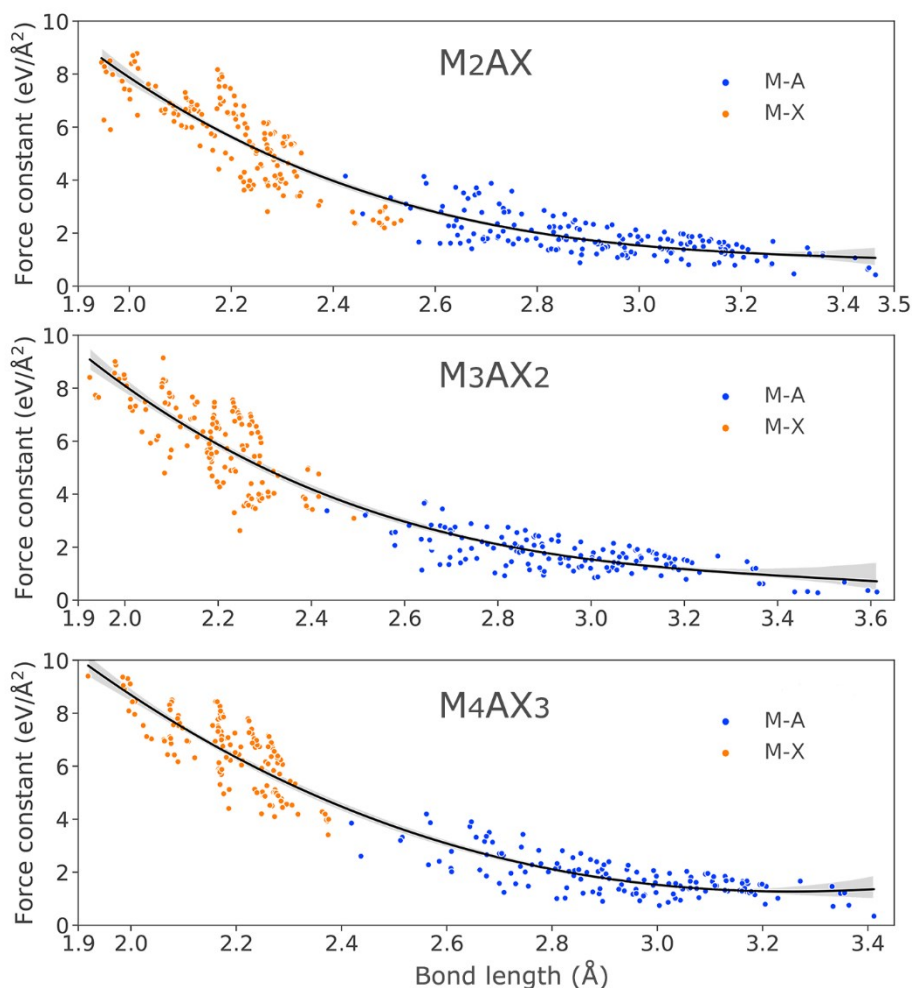

**Figure S7.** Calculated force constants for M-A and M-X bonds with reference to the bond length for each predicted MAX phases separately. The solid line is a third order of a polynomial regression



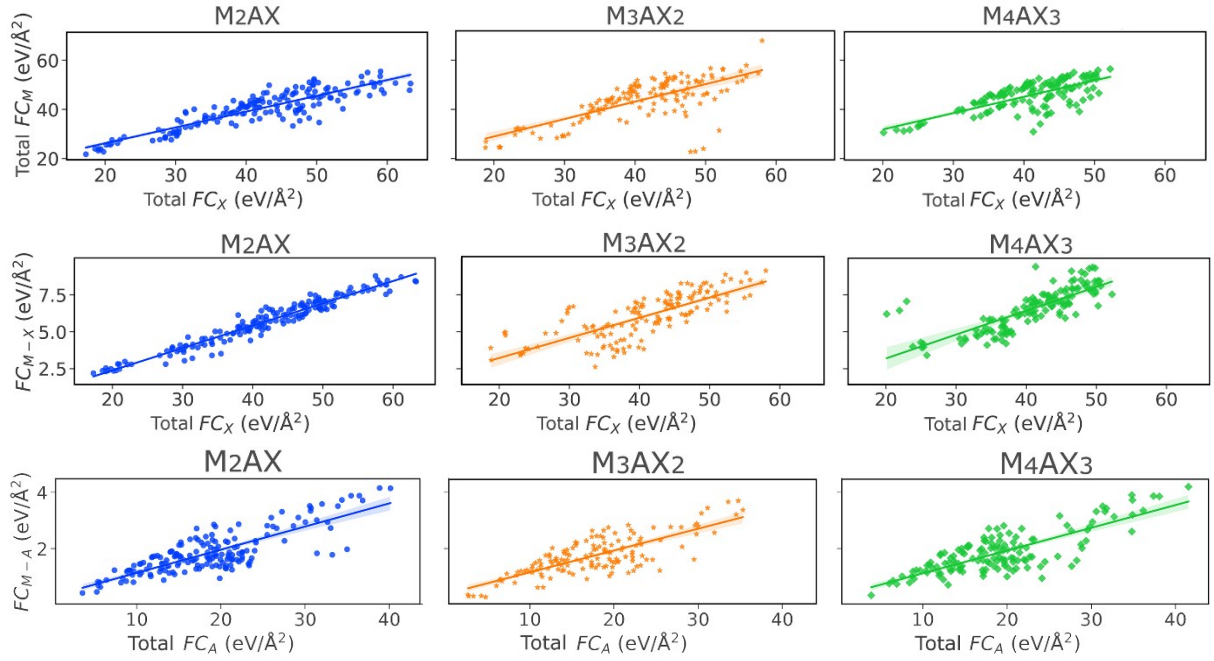

**Figure S8.** Calculated total force constants on M-element with reference to the calculated total force constants on X-element atoms, the force constants between M- and X-element atoms with reference to the calculated total force constants on X-element atoms, and the force constants between M- and A-element atoms with reference to the calculated total force constants on A-element atoms for each MAX phase separately. The solid line is the linear regression.

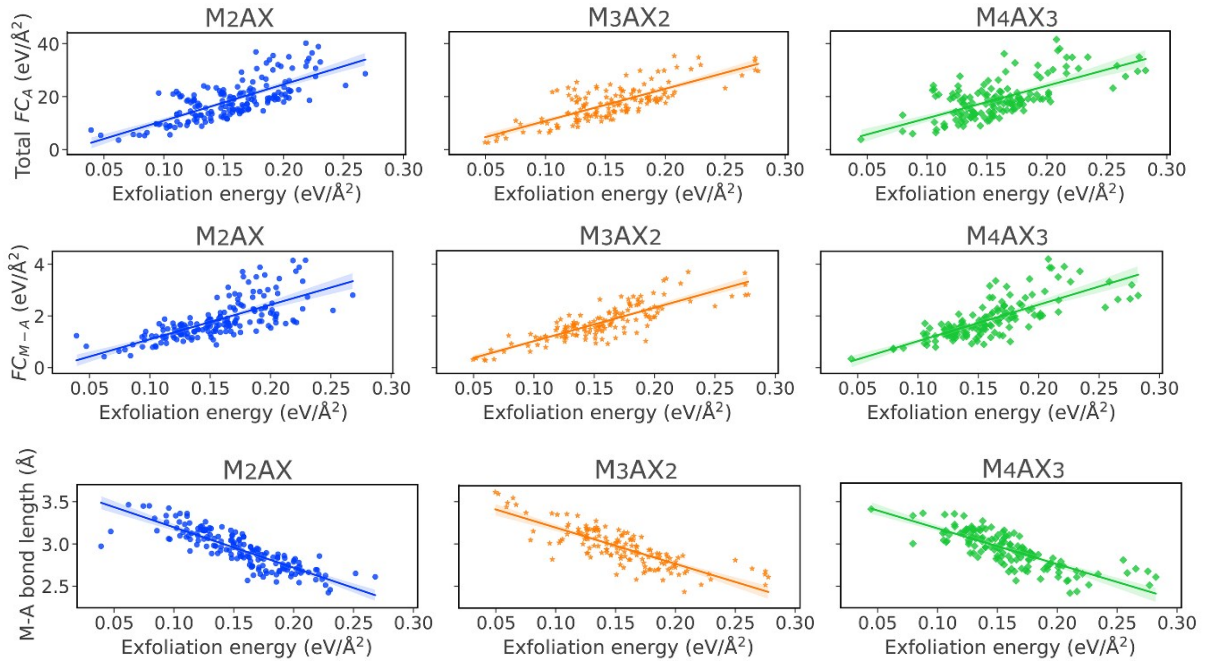

**Figure S9.** Calculated total force constants on A-element, the force constants between M- and A-element atoms, and M-A bond length for each MAX phase separately with reference to exfoliation energy. The solid line is the linear regression.
